# Supplementary material for: Enhancing Yield and Improving Grain Quality in Japonica Rice: Targeted EHD1 Editing via CRISPR-Cas9 in Low-Latitude Adaptation
Source: MDPI journal article supplement (doi:10.3390/cimb46040233), 2024-04-22
Supplement: s1 [file s1]

**Table S1.**

The heading date of elite northeast plain japonica varieties in Yangtze River region.

| Variety          | Sowing | Heading | Heading day(day) |
|------------------|--------|---------|------------------|
| Kong Yu 163      | 5/28   | 7/20    | 53               |
| Long Jing 180    | 5/28   | 8/3     | 67               |
| Long Jing 31     | 5/28   | 7/20    | 53               |
| Long Qing Dao 3  | 5/28   | 7/20    | 53               |
| Kong Yu 131      | 5/28   | 7/21    | 54               |
| He Jiang 19      | 5/28   | 7/20    | 53               |
| Tong 35          | 5/28   | 7/30    | 63               |
| Long Jing 47     | 5/28   | 8/1     | 65               |
| Dong Nong 418    | 5/28   | 7/21    | 54               |
| Xiang Shui 1     | 5/28   | 7/30    | 63               |
| Xiang Shui 2     | 5/28   | 8/4     | 68               |
| Zhong Ke Fa 6    | 5/28   | 8/3     | 67               |
| Xiang Shui 4     | 5/28   | 8/2     | 66               |
| Zhong Ke 804     | 5/28   | 8/4     | 68               |
| Xiang Shui 918   | 5/28   | 7/26    | 59               |
| Zhong Ke Fa 5    | 5/28   | 8/6     | 70               |
| Zhen Bao Dao 1   | 5/28   | 7/28    | 61               |
| Long Jing 21     | 5/28   | 7/18    | 51               |
| Long Dao 856     | 5/28   | 8/6     | 70               |
| Ken Xiang Dao    | 5/28   | 7/24    | 57               |
| Long Dao 3       | 5/28   | 7/20    | 53               |
| Ken Dao 10       | 5/28   | 7/27    | 60               |
| Long Dao 20      | 5/28   | 7/28    | 61               |
| Lian Dao 1       | 5/28   | 8/3     | 67               |
| Kong Yu 151      | 5/28   | 7/20    | 53               |
| Lian Dao 2       | 5/28   | 7/22    | 55               |
| Long Ken 257     | 5/28   | 7/23    | 56               |
| Shui Dao 3       | 5/28   | 7/21    | 54               |
| Long Jing 57     | 5/28   | 7/21    | 54               |
| 5 You Dao 4      | 5/28   | 8/4     | 68               |
| Qing Dao 15-851  | 5/28   | 7/20    | 53               |
| Mu Dan Jiang 30  | 5/28   | 7/19    | 52               |
| Long Ken 263     | 5/28   | 7/19    | 52               |
| San Jiang 12     | 5/28   | 8/5     | 69               |
| San Jiang 6      | 5/28   | 7/20    | 53               |
| Qing Dao 13-851  | 5/28   | 7/20    | 53               |
| Nong Da 3811     | 5/28   | 7/20    | 53               |
| Nong Da 3045     | 5/28   | 7/20    | 53               |
| Qiu Guang        | 5/28   | 7/20    | 53               |
| Miao Xiang Dao 1 | 5/28   | 7/20    | 53               |
| Long Jing 26     | 5/28   | 7/19    | 52               |

|                  |      |      |    |
|------------------|------|------|----|
| Long Ken 222     | 5/28 | 7/20 | 53 |
| Long Jing 31     | 5/28 | 7/20 | 53 |
| Long Jing 25     | 5/28 | 7/29 | 62 |
| Long Ken 262     | 5/28 | 7/20 | 53 |
| Long Ken 261     | 5/28 | 7/20 | 53 |
| Long Jing 43     | 5/28 | 7/20 | 53 |
| Long Jing 29     | 5/28 | 7/20 | 53 |
| Long Jing 27     | 5/28 | 7/27 | 60 |
| Ken Yu 10427     | 5/28 | 7/21 | 54 |
| Long Jing 217    | 5/28 | 7/20 | 53 |
| Long Jing 21     | 5/28 | 7/20 | 53 |
| Long Jing 20     | 5/28 | 7/20 | 53 |
| Kong Yu 101      | 5/28 | 7/20 | 53 |
| Long Jing 201    | 5/28 | 7/20 | 53 |
| Long Dao 18      | 5/28 | 7/20 | 53 |
| Ken Dao 179      | 5/28 | 7/21 | 54 |
| Len Dao 1608     | 5/28 | 7/23 | 56 |
| Ken Jing 161     | 5/28 | 7/22 | 55 |
| Ken Dao 1        | 5/28 | 7/23 | 56 |
| Ken Dao 12-805   | 5/28 | 7/21 | 54 |
| Ken Dao 20122133 | 5/28 | 7/19 | 52 |
| Qiangj Ing18     | 5/28 | 7/26 | 59 |
| Long Jing 46     | 5/28 | 7/21 | 54 |
| Ken Yan 02       | 5/28 | 8/1  | 65 |
| Ken Yan 03       | 5/28 | 7/21 | 54 |
| Ken Yan 04       | 5/28 | 7/20 | 53 |
| Ken Yan 05       | 5/28 | 7/20 | 53 |
| Ken Jing 5       | 5/28 | 7/19 | 52 |
| Ken Dao 87       | 5/28 | 7/20 | 53 |
| Ken Jing 1609    | 5/28 | 7/20 | 53 |
| Ken Jing 12      | 5/28 | 7/31 | 64 |
| Ken Dao 12489    | 5/28 | 7/21 | 54 |
| Kan Dao 95       | 5/28 | 7/31 | 64 |
| Kan Dao 92       | 5/28 | 7/20 | 53 |
| Kan Dao 91       | 5/28 | 7/19 | 52 |
| Kenjing 6        | 5/28 | 7/19 | 52 |
| Ken Dao 61       | 5/28 | 7/29 | 62 |
| Ken Dao 63       | 5/28 | 7/20 | 53 |
| Ken Dao 70       | 5/28 | 7/20 | 53 |
| Ken Dao 73       | 5/28 | 8/2  | 66 |
| Ken Dao 81       | 5/28 | 7/20 | 53 |
| Kan Dao 85       | 5/28 | 7/20 | 53 |
| Kan Dao 86       | 5/28 | 7/19 | 52 |
| Ken Dao 9        | 5/28 | 7/19 | 52 |

|                  |      |      |     |
|------------------|------|------|-----|
| Kan Dao 90       | 5/28 | 7/18 | 51  |
| Kan Dao 19       | 5/28 | 7/19 | 52  |
| Kan Dao 20       | 5/28 | 7/20 | 53  |
| Kan Dao 23       | 5/28 | 7/21 | 54  |
| Kan Dao 25       | 5/28 | 7/22 | 55  |
| Kan Dao 26       | 5/28 | 7/21 | 54  |
| Kan Dao 20       | 5/28 | 7/20 | 53  |
| Kan Dao 30       | 5/28 | 7/20 | 53  |
| Kan Dao 41       | 5/28 | 7/21 | 54  |
| Ken Dao 46       | 5/28 | 7/24 | 57  |
| Kan Dao 60       | 5/28 | 7/21 | 54  |
| Ken 11-2061      | 5/28 | 7/22 | 55  |
| Ken 11-913       | 5/28 | 7/21 | 54  |
| Ken 13-1628      | 5/28 | 8/4  | 68  |
| Ken 13-1646      | 5/28 | 7/20 | 53  |
| Ken 143202       | 5/28 | 7/21 | 54  |
| Ken 14387        | 5/28 | 7/21 | 54  |
| Ken Dao 11-299   | 5/28 | 7/22 | 55  |
| Ken Dao 12       | 5/28 | 7/26 | 59  |
| Kan Dao 1511     | 5/28 | 7/24 | 57  |
| Kan Dao 17       | 5/28 | 8/1  | 65  |
| Dong Nong 427    | 5/28 | 7/23 | 56  |
| Fu 004           | 5/28 | 7/21 | 54  |
| Fu He 2          | 5/28 | 7/21 | 54  |
| Jian 08-603      | 5/28 | 7/21 | 54  |
| Jian Jing 1202   | 5/28 | 7/18 | 51  |
| Ken 10-1620      | 5/28 | 8/1  | 65  |
| Wu You Dao 4     | 5/28 | 8/4  | 68  |
| Song Jing 29     | 5/28 | 7/28 | 61  |
| Suijing 109      | 5/28 | 8/6  | 70  |
| Qijing 10        | 5/28 | 8/5  | 69  |
| Longjing 1755    | 5/28 | 8/1  | 65  |
| Ji Yuan Xiang 1  | 5/28 | 7/28 | 61  |
| Yi Nong Xiang 12 | 5/28 | 7/27 | 60  |
| Zhe 08B          | 5/28 | 9/6  | 101 |
| Zhejiang 99      | 5/28 | 8/28 | 92  |

**Table S2.**

The number of plants detected in the two Yi Nong Xiang 12 PAM sites and Ji Yuan Xiang 1 PAM sites.

| Variety          | No. of transgenic plants | No. of plants with gRNA1 mutations(%)* | No. of plants with gRNA2 mutations(%)* |
|------------------|--------------------------|----------------------------------------|----------------------------------------|
| Yi Nong Xiang 12 | 21                       | 0                                      | 10(47.6)                               |
| Ji Yuan Xiang 1  | 38                       | 3(78.9)                                | 13(34.2)                               |

**Table S3.**

Primer sequences used in this study.

| Primer name    | Primer sequence (5'-3')  |
|----------------|--------------------------|
| RFT1-qRT F     | CGTGATGGTAGACCCGGATG     |
| RFT1-qRT R     | GCCCAAATGTTGCTCCAGTG     |
| Hd3a-qRT F     | TAGGGTTGTGGGTGATGTGC     |
| Hd3a-qRT R     | CCATTGGACACGGTCTTGGA     |
| OsUBQ-F        | AACCAGCTGAGGCCCAAGA      |
| OsUBQ-R        | ACGATTGATTAAACCAGTCCATGA |
| Ehd1-H1-gRNA   | CCTCCATCAATATTAGCCATGGC  |
| Ehd1-H2-gRNA   | TACGAGACCTCGGAAAAGTCCAGG |
| Ehd1 -site-idF | GGATCGAAGAGCTGAGCAAC     |
| Ehd1 -site-idR | GATCACTCACTGTCTTCTCCG    |

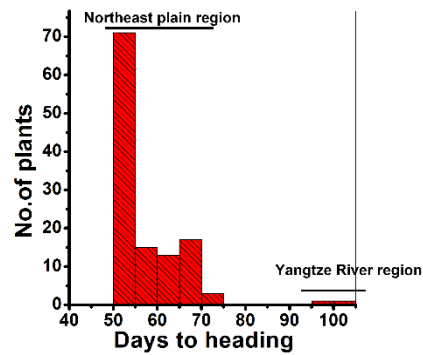**Figure S1.** Frequency distribution of heading date of the elite northeast plain *japonica* varieties and two control *japonica* varieties.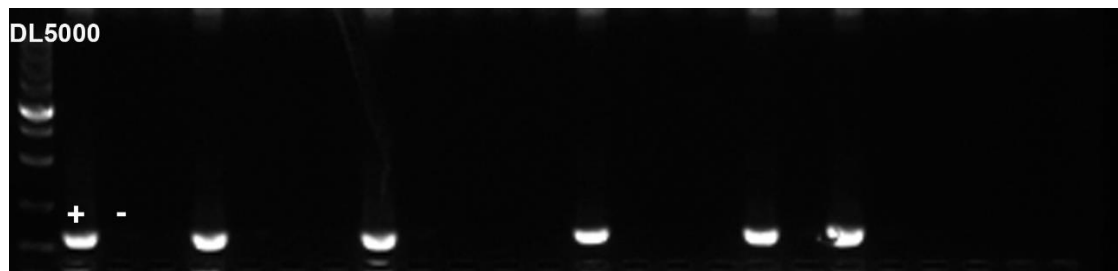**Figure S2:** Identification of hygromycin in different edited plants.
